# Supplementary material
Source: PubMed Central journal article supplement (PMC8385759)
Supplement: NIHMS1734032-supplement-SI.pdf [file NIHMS1734032-supplement-SI.pdf]

## SUPPORTING INFORMATION

### Lipid Nanoparticle Spherical Nucleic Acids for Intracellular DNA and RNA Delivery

*Andrew J. Sinegra<sup>#§</sup>, Michael Evangelopoulos<sup>#§</sup>, Jungsoo Park<sup>†§</sup>, Ziyin Huang<sup>‡§</sup>, and Chad A. Mirkin<sup>❖§\*</sup>*

<sup>#</sup> Department of Biomedical Engineering, Northwestern University, Evanston Illinois 60208, United States.

<sup>†</sup> Interdisciplinary Biological Sciences Graduate Program, Northwestern University, Evanston, Illinois 60208, United States

<sup>‡</sup> Department of Materials Science and Engineering, Northwestern University, Evanston, Illinois, 60208, United States

<sup>❖</sup> Department of Chemistry, Northwestern University, Evanston, Illinois 60208, United States.

<sup>§</sup> International Institute for Nanotechnology, Northwestern University, Evanston, Illinois 60208, United States.

\*Address correspondence to: [chadnano@northwestern.edu](mailto:chadnano@northwestern.edu) .

## Contents

|                                                                                      |    |
|--------------------------------------------------------------------------------------|----|
| <b>1. Materials and Methods</b> .....                                                | 4  |
| <b>2. Synthesis and Characterization of LSNAs</b> .....                              | 8  |
| Table S1. LNP-SNA formulations used .....                                            | 8  |
| Table S2. DNA sequences used.....                                                    | 9  |
| Figure S1. Agarose gel to confirm surface DNA conjugation.....                       | 10 |
| <b>3. Screening LNP-SNA Structures</b> .....                                         | 11 |
| Figure S2. DNA sequence controls for Library A screening.....                        | 11 |
| Figure S3. Sequence controls used in Library B screening .....                       | 11 |
| Figure S4. Results of Library B screening.....                                       | 12 |
| Table S3. Predictor Rank in Library B using Bootstrap Forest.....                    | 13 |
| Table S4. Summary of linear model used in Lib. B Analysis .....                      | 14 |
| Figure S5. Example main effects and desirability plots for SNAs in Library B. ....   | 16 |
| Figure S6. Interaction effects between parameters in library B .....                 | 17 |
| Figure S7. Initial Screening of siRNA-containing LNP-SNAs in B16-F10-Luc2 cells..... | 18 |
| Table S5. mRNA encapsulation efficiency of top LNP-SNA candidates .....              | 19 |
| Figure S8. Characterization of LNP-SNA B-19 with encapsulated Luc2 mRNA .....        | 20 |
| Figure S9. LNP-SNA mRNA expression profile is sequence-dependent. ....               | 21 |
| <b>4. Discussion of DoE Optimization Process</b> .....                               | 22 |

## 1. Materials and Methods

### *Materials*

DNA was synthesized using automated solid support phosphoramidite synthesis (model: MM12, BioAutomation, Inc.). Sequences were purified by reverse phase high-pressure liquid chromatography (HPLC, Agilent Technologies) and characterized using matrix assisted laser desorption ionization-time of flight (MALDI-ToF, Bruker Autoflex III). The DNA sequences used for experiments are listed in **Table S1**. Firefly luciferase mRNA was purchased from TriLink BioTechnologies.

DLin-MC3-DMA was purchased from MedChemExpress. DMPE-PEG(2000) Maleimide, DPPE-PEG(2000) Maleimide, and DSPE-PEG(2000) Maleimide were purchased from Nanocs, Inc. Cholesterol and Triton<sup>TM</sup>-X-100 were purchased from Sigma. DOPC, DSPC, 18:1 DAP, and DOPE were purchased from Avanti Polar lipids, Inc. Lipofectamine<sup>TM</sup> 2000, Quant-iT<sup>TM</sup> PicoGreen<sup>TM</sup> dsDNA reagent, Quant-iT<sup>TM</sup> RiboGreen<sup>TM</sup> reagent, and 20× TE buffer were purchased from ThermoFisher. D-Luciferin was purchased from Gold Biotechnologies, and Luc mRNA was purchased from TriLink Biotechnologies.

### *LNP-SNA Formulation*

LNPs were formulated using the ethanol dilution method. Briefly, lipids and cholesterol were dissolved in 100% ethanol. dsDNA was dissolved in 10 mM citrate at pH 4.0 at a mass ratio of 5:1 ionizable lipid:dsDNA. After making both solutions, DNA was rapidly pipette mixed with the ethanol solution at a volume ratio of 3:1. After mixing, LNPs were dialyzed two times in a Pierce<sup>TM</sup> 3K MWCO microdialysis plate (ThermoFisher) for 60 min against 1× PBS. Then, LNPs were added to microcentrifuge tubes containing 1 equivalent of lyophilized thiol-terminated DNA sequences and shaken at 700 rpm at room temperature overnight to facilitate the reaction of maleimide-functionalized PEG lipids with sulfhydryl-terminated DNA.

### *LNP-SNA Characterization*

LNP-SNAs size and nanoparticle concentration were determined by nanoparticle tracking analysis (NTA) using a Malvern NanoSight NS300 fitted with a NanoSight sample assistant. Nanoparticles were diluted 1:1000 in water and run through the microfluidics at 50  $\mu$ L/min. Size was determined using

the NTA software with a manually set detection threshold to avoid background. Encapsulation efficiency of dsDNA and RNA was determined by modified Quant-iT™ PicoGreen™ and Quant-iT™ RiboGreen™ (Invitrogen) assays, respectively. Briefly, two separate standard curves were created with the encapsulated nucleic acid. One was in 1× TE Buffer while the other contained 1× TE Buffer supplemented with 0.1% Triton™-X-100. Two samples were created from each nanoparticle, one diluted in TE and one diluted in TE with 0.1% Triton™-X-100. Following, 100 μL of 1× PicoGreen™ (dsDNA) or RiboGreen™ was added on top of the standards and samples and fluorescence of each sample was measured using a plate reader. Concentration of free nucleic acids were determined from the TE standard curve and concentration of total nucleic acids was determined by the particles lysed in 0.1% Triton™-X-100. From this, the encapsulation efficiency was calculated from the following formula:  $(TritonX - [TE])/([TritonX])$  or  $([Total] - [Free])/([Total])$ .

#### *Cellular assays to measure cGAS-STING pathway activation*

The Raw 264.7- Lucia™ ISG cell line was purchased from Invivogen. For *in vitro* experiments, Zeocin™, Normocin™, and QUANTI-Luc™ were purchased from Invivogen. All cell lines were cultured according to the manufacturer's specifications. All cell lines were tested for *Mycoplasma* contamination and grown in a humidified atmosphere with 5% CO<sub>2</sub> at 37 °C.

The specified nanoparticle formulations and controls were diluted in Opti-MEM (Gibco) and plated in triplicate in a 96-well plate. Cell were then plated on top of the nanoparticle treatments at 100,000 cells per well. After a 24 h incubation, 20 μL of the media was removed and IRF3 induction was quantified using the Quanti-Luc™ reagent (Invivogen) according to the manufacturer's protocol. To normalize the number of viable cells to the amount of IRF3 induction we achieved, we used the PrestoBlue™ HS cell permeable viability reagent (Thermo Fisher). Next, additional media was removed such that the volume within the plate was 90 μL. 10 μL of PrestoBlue™ was added per well and the plates were incubated for 15 min, at which point the fluorescence was read according to the manufacturer's protocol. The IRF3 induction (luminescence) was then normalized to viable cells (PrestoBlue™ fluorescence) on a well-by-well basis.

### *LNP-SNAs delivering siRNA in cellular assays*

U87-Luc2 cell lines were obtained from ATCC and cultured according to the manufacturer's specifications. To assess siRNA-mediated gene silencing, the top five LNP-SNA candidates from the cGAS-STING pathways screening were formulated with siLuc2 and paired with control LNP-SNAs formulated with siGFP. Therefore, gene silencing could be read out as a decrease in luminescence due to silencing of Luc2.

The specified nanoparticle formulations and transfected siRNA controls were diluted in Opti-MEM (Gibco) and plated in triplicate in a 96-well plate. Cells were then plated on top of the nanoparticle treatments at 50,000 cells per well. After a 24 h incubation, 120  $\mu$ L of the media was removed and 20  $\mu$ L of CellTiter-Fluor™ reagent (Promega) was added to measure the number of viable cells within each well. After a 30 min incubation at 37 °C, fluorescence was read according to the manufacturer's protocol. Wells were subsequently washed with 100  $\mu$ L of PBS three times. Luc2 luminescence was read using the Luciferase Assay System (Promega). Luc2 gene silencing was assessed in arbitrary units normalized to the CellTiter-Fluor™ viability.

### *Animal handling*

Female mice (C57Bl/6) in the age range of 8-12 weeks were obtained from The Jackson Laboratory and maintained in conventional housing. All animals used were handled according to methods and procedures approved by the Institutional Animal Care and Use Committee at Northwestern University.

### *Luciferase (Luc2) mRNA expression*

Cleancap® Luciferase mRNA was purchased from TriLink Biotechnologies. Mice were given a single bolus injection of 0.1 mg kg<sup>-1</sup> of mRNA-containing formulations. After 6 h, mice were injected intraperitoneally with 150 mg kg<sup>-1</sup> of D-luciferin. Animals were then sacrificed, and major organs were harvested and soaked in a 300  $\mu$ g mL<sup>-1</sup> solution of D-luciferin. Individual organs were then imaged using an IVIS Spectrum instrument (Perkin Elmer).

### *Statistical analysis*

Design of Experiment (DoE) was used to create library designs A and B. DoE and statistical analysis were performed using R version 3.6.1 ([cran.r-project.org](http://cran.r-project.org)) and JMP Pro 15. Descriptions of the DoE and statistical analysis are available in greater detail in section 4 of the Supporting Information. Statistical significance is defined as having a p-value of less than 0.05 in this study. All results are expressed as the mean  $\pm$  SE and number of biological replicates (n) as noted in the figure captions. To design the 1<sup>st</sup> generation library, we used a definitive screening design to estimate the main and two-factor effects using less experimental runs. The factors used in Library A were: lipid-PEG Length, PEG mol %, chol. mol %, and ionizable lipid. For Library B, we used JMP to design a 3<sup>3</sup>2<sup>2</sup> resolution IV fractional factorial design. The three-level factors used in Library B were phospholipid, PEG mol %, and chol mol %. The two-level factors used were PEG length and DNA sequence. Again, in this design, we were only interested in the main effects and first order interaction effects. Using a Custom Experiment Design on JMP, the minimum number of nanoparticles to run was 37 of the possible of the 108 full factorials. JMP software was used to plot the main effects and first order interaction effects in this experiment. To calculate the least squares regression model, we reduced the model until only significant main effects and first order interaction effects were included.

For mouse experiments, the free PS Power and Sample Size calculation tool Version 3.6.1 (Vanderbilt) was used to determine the minimum sample size for which the statistical power was greater than 0.8. This was generally 5-6 mice per group for Luc mRNA delivery experiment.

## 2. Synthesis and Characterization of LSNAs

**Table S1. LNP-SNA formulations used**

| Lib # | Phospholipid | ionizable lipid | lipid-PEG | surface DNA | % phospholipid | % chol. | % ionizable lipid | % lipid-PEG | EE (%) | size (nm) | sd (nm) |
|-------|--------------|-----------------|-----------|-------------|----------------|---------|-------------------|-------------|--------|-----------|---------|
| A_1   | DOPC         | DLin-MC3        | C18       | T21         | 10             | 35      | 50                | 5           | 82     | 159       | 79      |
| A_2   | DOPC         | 18:1 DAP        | C14       | T21         | 24             | 25      | 50                | 1           | 84     | 279       | 107     |
| A_3   | DOPC         | DLin-MC3        | C18       | T21         | 20             | 25      | 50                | 5           | 67     | 227       | 81      |
| A_4   | DOPC         | 18:1 DAP        | C14       | T21         | 14             | 35      | 50                | 1           | 85     | 221       | 105     |
| A_5   | DOPC         | 18:1 DAP        | C18       | T21         | 12.5           | 35      | 50                | 2.5         | 86     | 203       | 85      |
| A_6   | DOPC         | DLin-MC3        | C14       | T21         | 22.5           | 25      | 50                | 2.5         | 74     | 246       | 91      |
| A_7   | DOPC         | DLin-MC3        | C16       | T21         | 12.5           | 35      | 50                | 2.5         | 78     | 195       | 87      |
| A_8   | DOPC         | 18:1 DAP        | C16       | T21         | 22.5           | 25      | 50                | 2.5         | 83     | 190       | 91      |
| A_9   | DOPC         | DLin-MC3        | C14       | T21         | 10             | 35      | 50                | 5           | 56     | 236       | 71      |
| A_10  | DOPC         | 18:1 DAP        | C18       | T21         | 24             | 25      | 50                | 1           | 88     | 277       | 91      |
| A_11  | DOPC         | DLin-MC3        | C16       | T21         | 22.5           | 25      | 50                | 2.5         | 71     | 222       | 71      |
| A_12  | DOPC         | 18:1 DAP        | C16       | T21         | 12.5           | 35      | 50                | 2.5         | 87     | 178       | 83      |
| A_13  | DOPC         | 18:1 DAP        | C16       | T21         | 20             | 25      | 50                | 5           | 85     | 231       | 81      |
| A_14  | DOPC         | DLin-MC3        | C16       | T21         | 14             | 35      | 50                | 1           | 79     | 227       | 60      |
| A_15  | DOPC         | 18:1 DAP        | C16       | T21         | 10             | 35      | 50                | 5           | 83     | 187       | 84      |
| A_16  | DOPC         | DLin-MC3        | C16       | T21         | 24             | 25      | 50                | 1           | 71     | 229       | 69      |
| A_17  | DOPC         | 18:1 DAP        | C14       | T21         | 24             | 25      | 50                | 1           | 83     | 209       | 81      |
| A_18  | DOPC         | DLin-MC3        | C18       | T21         | 10             | 35      | 50                | 5           | 80     | 144       | 79      |
| B_1   | DSPC         | DLin-MC3        | C16       | GGT7        | 12.5           | 35      | 50                | 2.5         | 100    | 194       | 80      |
| B_2   | DSPC         | DLin-MC3        | C16       | GGT7        | 12.5           | 35      | 50                | 2.5         | 103    | 197       | 73      |
| B_3   | DOPE         | DLin-MC3        | C14       | GGT7        | 22.5           | 25      | 50                | 2.5         | 77     | 220       | 77      |
| B_4   | DOPE         | DLin-MC3        | C14       | GGT7        | 22.5           | 25      | 50                | 2.5         | 84     | 217       | 76      |
| B_5   | DOPC         | DLin-MC3        | C16       | T21         | 1.5            | 45      | 50                | 3.5         | 95     | 202       | 73      |
| B_6   | DOPC         | DLin-MC3        | C16       | T21         | 1.5            | 45      | 50                | 3.5         | 97     | 184       | 76      |
| B_7   | DOPE         | DLin-MC3        | C16       | GGT7        | 21.5           | 25      | 50                | 3.5         | 94     | 194       | 66      |
| B_8   | DSPC         | DLin-MC3        | C14       | T21         | 22.5           | 25      | 50                | 2.5         | 93     | 274       | 82      |
| B_9   | DOPE         | DLin-MC3        | C16       | GGT7        | 13.5           | 35      | 50                | 1.5         | 98     | 218       | 78      |
| B_10  | DSPC         | DLin-MC3        | C16       | GGT7        | 23.5           | 25      | 50                | 1.5         | 101    | 317       | 94      |
| B_11  | DOPE         | DLin-MC3        | C14       | T21         | 12.5           | 35      | 50                | 2.5         | 86     | 232       | 75      |
| B_12  | DOPC         | DLin-MC3        | C14       | GGT7        | 1.5            | 45      | 50                | 3.5         | 91     | 233       | 79      |
| B_13  | DOPE         | DLin-MC3        | C16       | T21         | 3.5            | 45      | 50                | 1.5         | 98     | 194       | 71      |
| B_14  | DOPC         | DLin-MC3        | C16       | GGT7        | 22.5           | 25      | 50                | 2.5         | 99     | 225       | 82      |
| B_15  | DSPC         | DLin-MC3        | C14       | T21         | 3.5            | 45      | 50                | 1.5         | 92     | 239       | 82      |
| B_16  | DSPC         | DLin-MC3        | C14       | T21         | 11.5           | 35      | 50                | 3.5         | 93     | 242       | 77      |
| B_17  | DSPC         | DLin-MC3        | C14       | GGT7        | 2.5            | 45      | 50                | 2.5         | 75     | 276       | 70      |
| B_18  | DOPE         | DLin-MC3        | C14       | T21         | 23.5           | 25      | 50                | 1.5         | 72     | 303       | 70      |
| B_19  | DOPE         | DLin-MC3        | C14       | GGT7        | 3.5            | 45      | 50                | 1.5         | 73     | 229       | 93      |
| B_20  | DOPC         | DLin-MC3        | C14       | GGT7        | 12.5           | 35      | 50                | 2.5         | 76     | 231       | 89      |
| B_21  | DOPC         | DLin-MC3        | C16       | GGT7        | 11.5           | 35      | 50                | 3.5         | 79     | 210       | 76      |
| B_22  | DSPC         | DLin-MC3        | C16       | T21         | 2.5            | 45      | 50                | 2.5         | 79     | 229       | 79      |
| B_23  | DOPC         | DLin-MC3        | C14       | T21         | 21.5           | 25      | 50                | 3.5         | 75     | 220       | 76      |
| B_24  | DSPC         | DLin-MC3        | C14       | GGT7        | 13.5           | 35      | 50                | 1.5         | 80     | 239       | 81      |
| B_25  | DOPC         | DLin-MC3        | C16       | T21         | 23.5           | 25      | 50                | 1.5         | 80     | 240       | 95      |
| B_26  | DSPC         | DLin-MC3        | C16       | GGT7        | 1.5            | 45      | 50                | 3.5         | 76     | 237       | 83      |
| B_27  | DOPE         | DLin-MC3        | C14       | T21         | 1.5            | 45      | 50                | 3.5         | 74     | 266       | 91      |
| B_28  | DSPC         | DLin-MC3        | C16       | T21         | 11.5           | 35      | 50                | 3.5         | 72     | 243       | 83      |
| B_29  | DOPE         | DLin-MC3        | C14       | GGT7        | 11.5           | 35      | 50                | 3.5         | 72     | 270       | 84      |
| B_30  | DOPC         | DLin-MC3        | C14       | T21         | 2.5            | 45      | 50                | 2.5         | 76     | 295       | 84      |
| B_31  | DOPE         | DLin-MC3        | C16       | T21         | 22.5           | 25      | 50                | 2.5         | 74     | 223       | 79      |
| B_32  | DOPC         | DLin-MC3        | C14       | T21         | 13.5           | 35      | 50                | 1.5         | 77     | 277       | 90      |
| B_33  | DOPC         | DLin-MC3        | C16       | GGT7        | 3.5            | 45      | 50                | 1.5         | 79     | 187       | 72      |
| B_34  | DOPE         | DLin-MC3        | C16       | GGT7        | 2.5            | 45      | 50                | 2.5         | 76     | 214       | 81      |
| B_35  | DSPC         | DLin-MC3        | C14       | GGT7        | 21.5           | 25      | 50                | 3.5         | 79     | 206       | 72      |
| B_36  | DOPC         | DLin-MC3        | C16       | T21         | 12.5           | 35      | 50                | 2.5         | 80     | 232       | 73      |
| B_37  | DOPC         | DLin-MC3        | C14       | GGT7        | 23.5           | 25      | 50                | 1.5         | 81     | 203       | 76      |
| C_1   | DOPC         | DLin-MC3        | C16       | GGT7        | 2.5            | 45      | 50                | 2.5         | 85     | 212       | 88      |
| C_2   | DOPC         | DLin-MC3        | C16       | GGT7        | 1.5            | 45      | 50                | 3.5         | 90     | 167       | 106     |
| C_3   | DSPC         | DLin-MC3        | C16       | GGT7        | 3.5            | 45      | 50                | 1.5         | 86     | 147       | 99      |
| C_4   | DOPE         | DLin-MC3        | C16       | GGT7        | 3.5            | 45      | 50                | 1.5         | 87     | 102       | 62      |

**Table S2. DNA sequences used**

| <b>Formulation</b> | <b>DNA Sequence (5'-3')</b>                     |
|--------------------|-------------------------------------------------|
| T21 SNA            | TTTTTTTTTTTTTTTTTTTTTTT -SH <sup>a</sup>        |
| (GGT)7 SNA         | GGT GGT GGT GGT GGT GGT GGT GGT-SH <sup>a</sup> |

<sup>a</sup> Synthesized using Dithiol Serinol CpG (Glen Research), subsequently reduced using 100 mM DTT in 20 mM Tris HCl pH 8.3-8.5 for 30 min and desalted on a NAP-10 column (Cytiva).



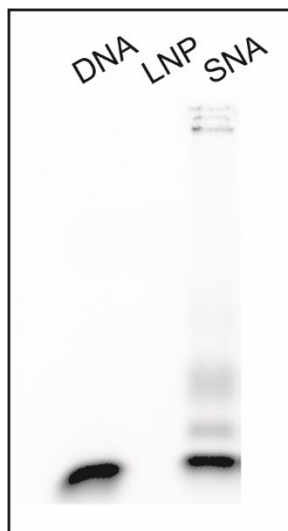

**Figure S1. Agarose gel to confirm surface DNA conjugation**

A.) 1% agarose gel run in 1X TAE buffer at 85 V for 45 min. to confirm conjugation of T21 DNA to LNPs after 2 h shaking at RT. One equivalent of a T21-SH DNA sequence labeled with Cy5.5 was added to formulation B-35, which contains 3.5% C14-PEG(2000)-Maleimides. Presence of bands at higher MW than free Cy5.5 DNA (Lane 1), indicates that they are conjugated to the lipid-PEG.

### 3. Screening LNP-SNA Structures

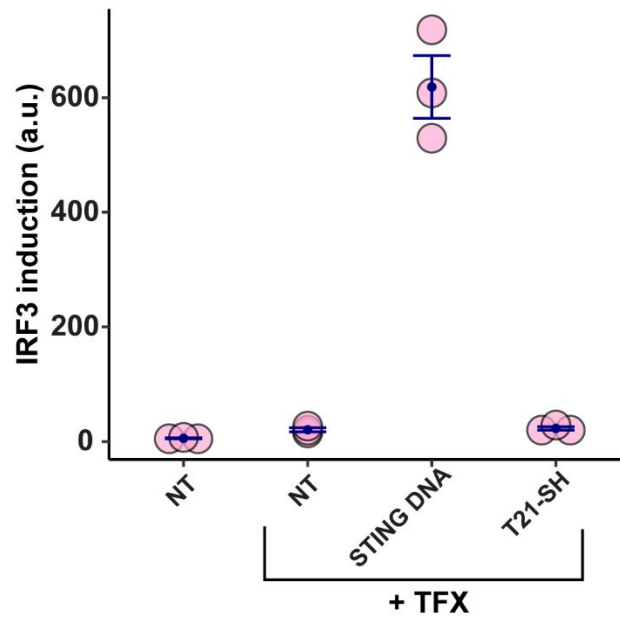

**Figure S2. DNA sequence controls for Library A screening.**

IRF3 induction of DNA sequences used in Library A measured after 24 h. Sequences were transfected with Lipofectamine 2000™ according to manufacturer's protocol. (TFX = with transfection; NT = not treated.)

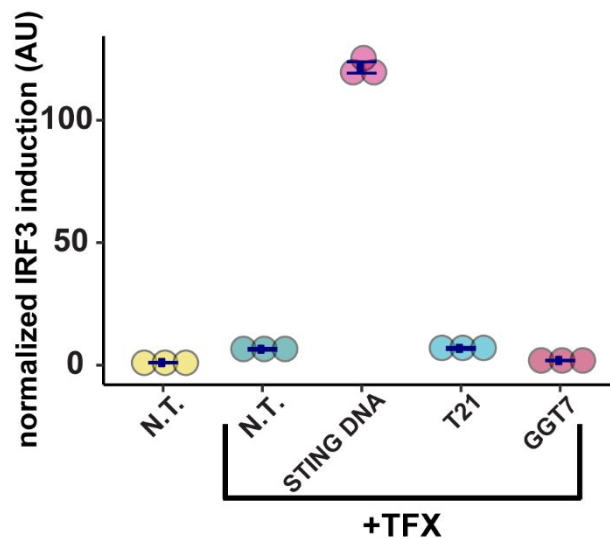

**Figure S3. Sequence controls used in Library B screening**

IRF3 induction of DNA sequences used in Library B measured after 24 h. Sequences were transfected with Lipofectamine 2000™ according to manufacturer's protocol. (TFX = with transfection; NT = not treated.)

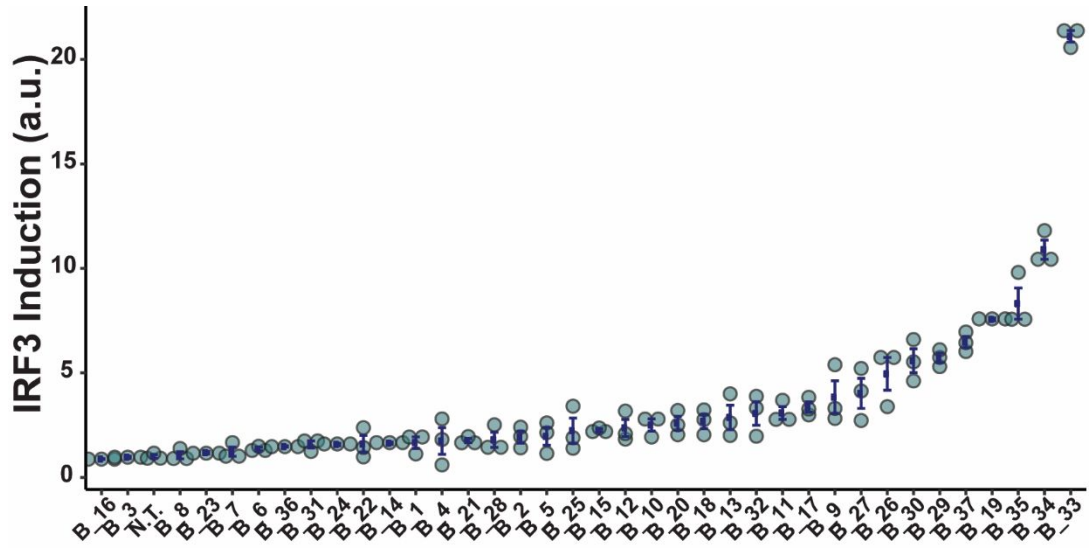

**Figure S4. Results of Library B screening**  
 IRF3 induction of LNP-SNAs used in Library B measured after 24 h. Results normalized to untreated wells. (NT = not treated, n = 3 biologically independent replicates)

**Table S3. Predictor Rank in Library B using Bootstrap Forest**

| <b>Predictor</b> | <b>Portion</b> |                                                                                   | <b>Rank</b> |
|------------------|----------------|-----------------------------------------------------------------------------------|-------------|
| chol%            | 0.3539         |  | 1           |
| DNA_seq          | 0.2422         |  | 2           |
| PEG%             | 0.1902         |  | 3           |
| Phospholipid     | 0.1563         |  | 4           |
| Peg length       | 0.0574         |  | 5           |

**Table S4. Summary of linear model used in Lib. B Analysis**

| Summary of Fit             |          |
|----------------------------|----------|
| RSquare                    | 0.998965 |
| RSquare Adj                | 0.987577 |
| Root Mean Square Error     | 0.088216 |
| Mean of Response           | 0.749427 |
| Observations (or Sum Wgts) | 37       |

| Analysis of Variance |    |                |             |                    |
|----------------------|----|----------------|-------------|--------------------|
| Source               | DF | Sum of Squares | Mean Square | F Ratio            |
| Model                | 33 | 22.527795      | 0.682660    | 87.7217            |
| Error                | 3  | 0.023346       | 0.007782    | <b>Prob &gt; F</b> |
| C. Total             | 36 | 22.551142      |             | 0.0017*            |

| Effect Tests            |       |    |                |          |          |
|-------------------------|-------|----|----------------|----------|----------|
| Source                  | Nparm | DF | Sum of Squares | F Ratio  | Prob > F |
| Phospholipid            | 2     | 2  | 1.0969107      | 70.4764  | 0.0030*  |
| PEG%                    | 2     | 2  | 0.6603282      | 42.4260  | 0.0063*  |
| chol%                   | 2     | 2  | 4.7502410      | 305.2025 | 0.0003*  |
| Peg length              | 1     | 1  | 0.0899112      | 11.5536  | 0.0425*  |
| DNA_seq                 | 1     | 1  | 1.6965052      | 218.0006 | 0.0007*  |
| Phospholipid*PEG%       | 4     | 4  | 5.0465053      | 162.1187 | 0.0008*  |
| Phospholipid*chol%      | 4     | 4  | 2.0945087      | 67.2860  | 0.0029*  |
| PEG%*chol%              | 4     | 4  | 2.6670092      | 85.6775  | 0.0020*  |
| Phospholipid*Peg length | 2     | 2  | 0.2712912      | 17.4304  | 0.0223*  |
| PEG%*Peg length         | 2     | 2  | 0.4875167      | 31.3229  | 0.0098*  |
| chol%*Peg length        | 2     | 2  | 0.6619163      | 42.5281  | 0.0063*  |
| Phospholipid*DNA_seq    | 2     | 2  | 0.5468453      | 35.1348  | 0.0083*  |
| PEG%*DNA_seq            | 2     | 2  | 0.5789667      | 37.1986  | 0.0076*  |
| chol%*DNA_seq           | 2     | 2  | 1.3582040      | 87.2645  | 0.0022*  |
| Peg length*DNA_seq      | 1     | 1  | 0.1130788      | 14.5306  | 0.0317*  |

| Source                  | LogWorth |  | PValue  |
|-------------------------|----------|--|---------|
| chol%                   | 3.466    |  | 0.00034 |
| DNA_seq                 | 3.171    |  | 0.00067 |
| Phospholipid*PEG%       | 3.108    |  | 0.00078 |
| PEG%*chol%              | 2.697    |  | 0.00201 |
| chol%*DNA_seq           | 2.658    |  | 0.00220 |
| Phospholipid*chol%      | 2.541    |  | 0.00287 |
| Phospholipid            | 2.522    |  | 0.00301 |
| chol%*Peg length        | 2.201    |  | 0.00629 |
| PEG%                    | 2.200    |  | 0.00631 |
| PEG%*DNA_seq            | 2.117    |  | 0.00763 |
| Phospholipid*DNA_seq    | 2.082    |  | 0.00829 |
| PEG%*Peg length         | 2.010    |  | 0.00977 |
| Phospholipid*Peg length | 1.652    |  | 0.02230 |
| Peg length*DNA_seq      | 1.498    |  | 0.03175 |
| Peg length              | 1.372    |  | 0.04249 |

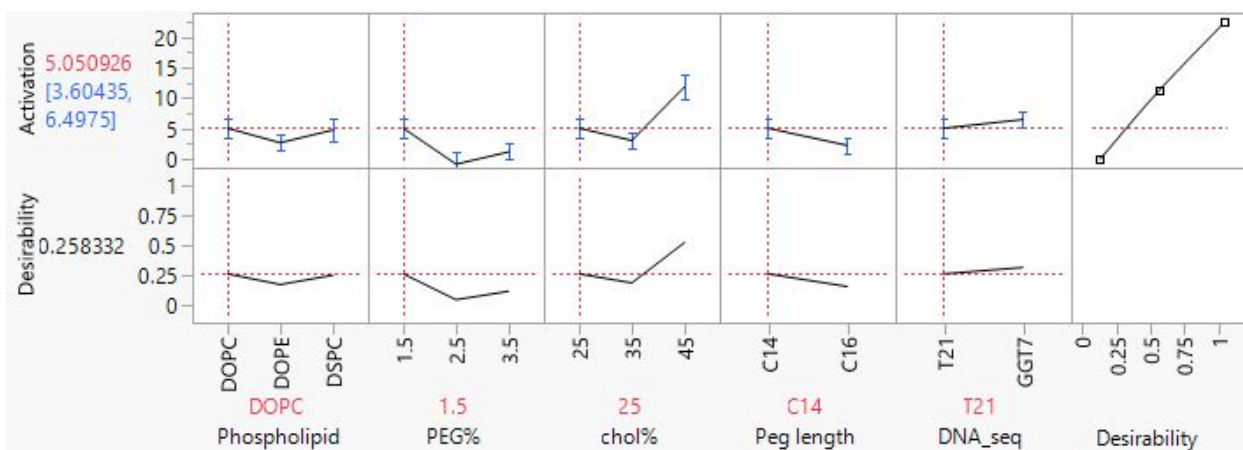

**Figure S5. Example main effects and desirability plots for SNAs in Library B.**

Activation (top row) and desirability (bottom row) of LNP-SNAs in Library B as a function of formulation parameters phospholipid, PEG%, cholesterol %, PEG length, and DNA sequence. The plot demonstrates how levels of each factor predict the activation or desirability (highest output of the Library scaled to 1, lowest output scaled to 0). In JMP, the red dashed lines can be moved to change levels of each factor, and the predicted activation is shown in red, along with a 95% confidence interval (blue).

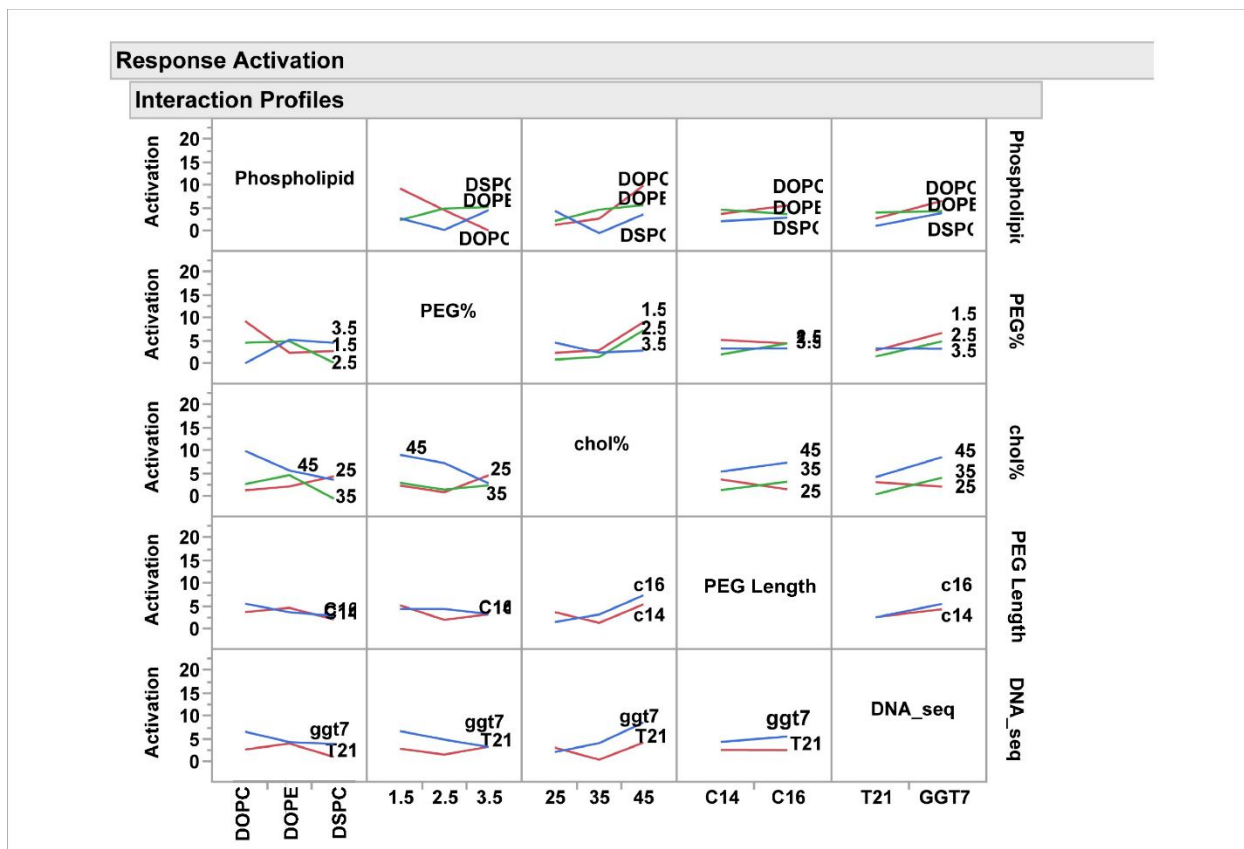

**Figure S6. Interaction effects between parameters in library B**

Interaction of each factor's levels (bottom) with another factor (right side). Plot reflects activity (a.u.), on the Y axis, as a function of the interaction between two factor levels in Library B.



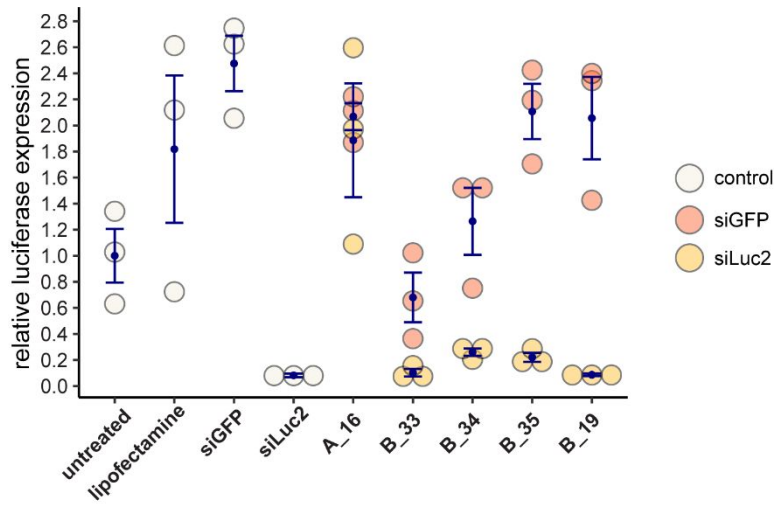

**Figure S7. Initial Screening of siRNA-containing LNP-SNAs in B16-F10-Luc2 cells**  
 B16-F10-Luc2 cells were treated with either transfected sequence controls (white) or LNP-SNAs formulated with either a control siGFP (orange) or siLuc2 (yellow) targeting sequence at 100 nM concentration for 24 h. (N.T. = not treated)

**Table S5. mRNA encapsulation efficiency of top LNP-SNA candidates**

| <b>Sample</b> | <b>Encapsulation efficiency (%)</b> | <b>Error (<math>\pm</math> %)</b> |
|---------------|-------------------------------------|-----------------------------------|
| B-35          | 46                                  | 4                                 |
| B-34          | 70                                  | 2                                 |
| B-19          | 78                                  | 3                                 |

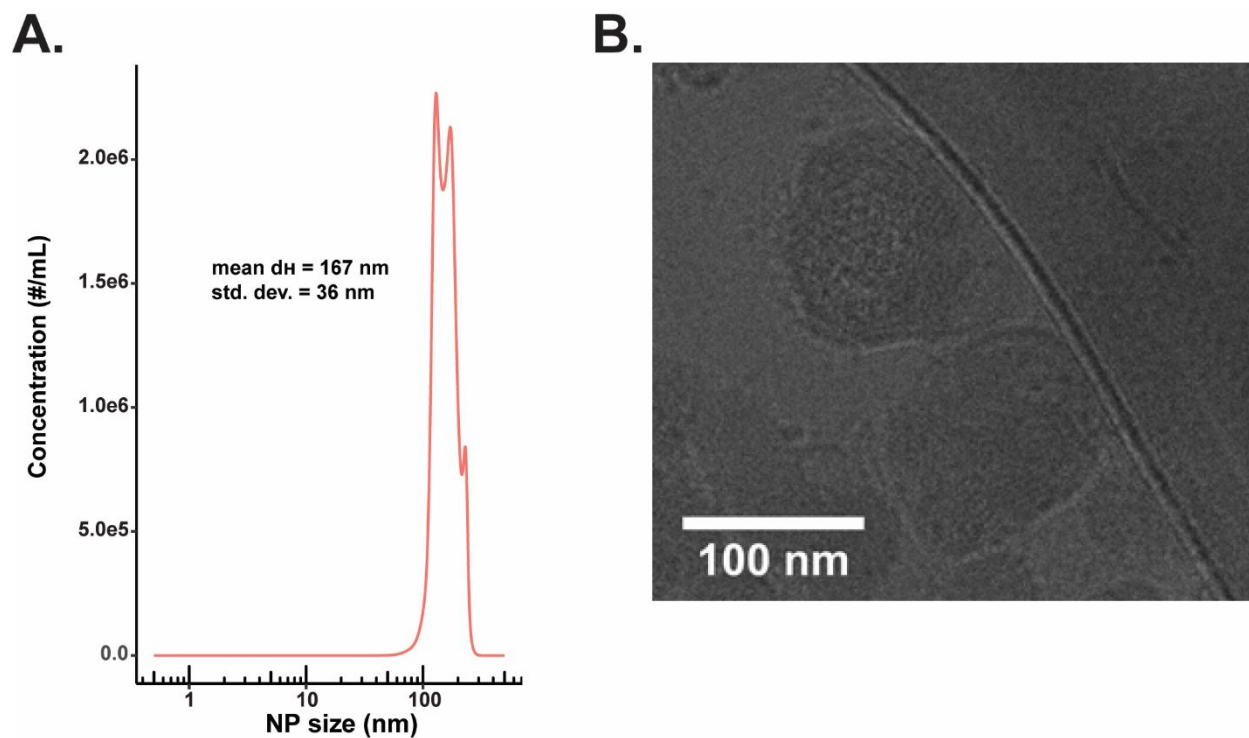

**Figure S8. Characterization of LNP-SNA B-19 with encapsulated Luc2 mRNA**  
(A) Plot of the average of three NanoSight runs of B-19 LNP-SNA. (B) Cryo-TEM image of the same SNA.

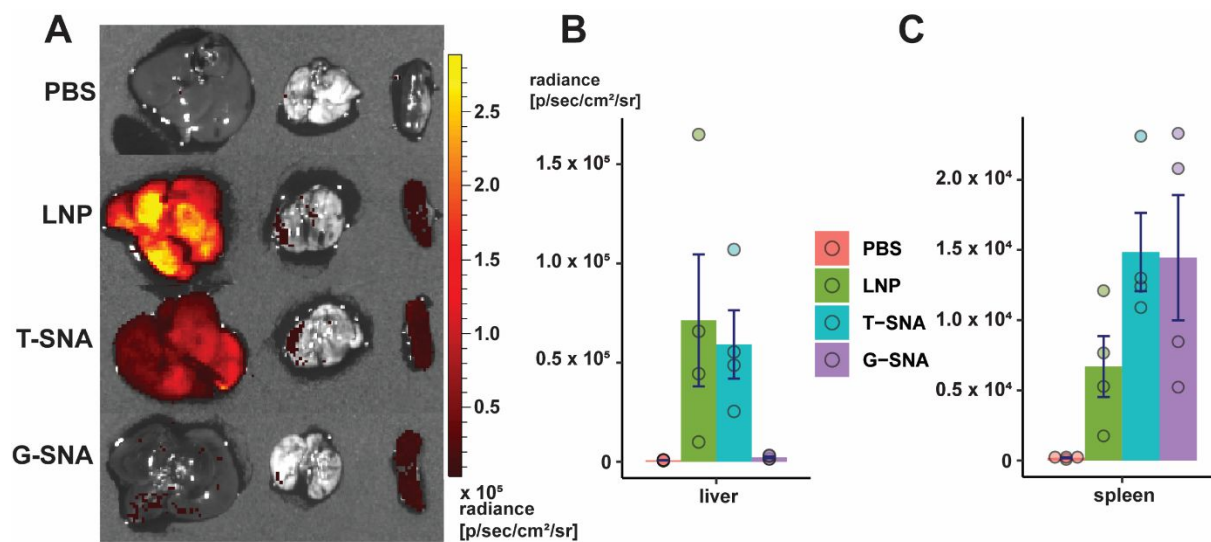

**Figure S9. LNP-SNA mRNA expression profile is sequence-dependent.**

(A) Luciferase mRNA in liver, lungs, and spleen by treatment. Luminescence was detected in harvested organs 6 h after administration of 0.1 mg kg<sup>-1</sup> Luc mRNA. (B) LNP and T-SNA exhibit significant liver mRNA expression while G-SNA does not. (C) G-SNA exhibits mRNA expression in the spleen at levels comparable to LNP and T-SNA. (T-SNA is LNP functionalized with T21-SH DNA, G-SNA is LNP functionalized with (GGT)7-SH DNA sequence, N=4 biologically independent replicates).

#### 4. Discussion of DoE Optimization Process

With the initial selection of factors, we had a  $2^2 3^2$  design. Because a full-factorial screening using this design would be 36 different nanoparticles, we used a definitive screening design (Jones and Nachtsheim) to estimate the main and two-factor effects using less experimental runs. In definitive screening experiments, unlike resolution III fractional factorial designs, the main effects are not confounded by two-factor interactions. Additionally, unlike resolution IV designs, two-factor interactions are not completely confounded with other two-factor interactions. These properties make it easier to move directly from screening to optimization. (For detailed descriptions of the creation and analysis of definitive screening and fractional factorial designs, we recommend the reader refer to the text *Design and Analysis of Experiments* (8<sup>th</sup> ed.) by Douglas C. Montgomery.)

In order to use a definitive screening design, we had to decompose the three level factors into two two-level factors (see **Table S3**). Using JMP software, we designed the nanoparticles required for definitive screening.

Following the use of a definitive screening design, we used a resolution IV fractional factorial design to perform further optimization. The base formulations were derived from the particles that exhibited significant IRF3 induction presented in Figure 2E. It is important to note that we used *coded* units instead of the *natural* or *engineering* units of each component presented in **Table S2**. Coded units make the magnitude of the coefficients in the model directly comparable so that we can compare the relative size of factor effects, e.g., we can directly compare the effect size of changing percent cholesterol or changing percent PEG-lipid without the results being masked by large differences in engineering units.

#### Standard Least Squares Regression Model

A model describing all of the first and second-order effects was constructed using JMP. The program lists the effects of each parameter and second-order effect in the model as well as the LogWorth ( $-\log_{10}(\text{FDR P-value})$ ).
